1 **Renewable Fatty Acid Ester Production in *Clostridium***

2 Jun Feng<sup>1,2,#</sup>, Jie Zhang<sup>1,2,#</sup>, Yiming Feng<sup>3</sup>, Pixiang Wang<sup>1,2</sup>, Pablo Jiménez-Bonilla<sup>1,2,4</sup>, Yanyan  
3 Gu<sup>1,2</sup>, Junping Zhou<sup>1,2</sup>, Zhong-Tian Zhang<sup>1,2</sup>, Mingfeng Cao<sup>5,6</sup>, Zengyi Shao<sup>5,6</sup>, Ilya Borovok<sup>7</sup>,  
4 Haibo Huang<sup>3,\*</sup>, Yi Wang<sup>1,2,\*</sup>

5  
6 <sup>1</sup>Department of Biosystems Engineering, Auburn University, Auburn, Alabama 36849, USA

7 <sup>2</sup>Center for Bioenergy and Bioproducts, Auburn University, Auburn, AL 36849, USA

8 <sup>3</sup>Department of Food Science and Technology, Virginia Tech, Blacksburg, VA 24061, USA

9 <sup>4</sup>School of Chemistry, National University (UNA), Heredia, Costa Rica

10 <sup>5</sup>Department of Chemical and Biological Engineering, Iowa State University, Ames, IA,  
11 50011, USA

12 <sup>6</sup>NSF Engineering Research Center for Biorenewable Chemicals, Iowa State University,  
13 Ames, IA, 50011, USA

14 <sup>7</sup>The School of Molecular Cell Biology and Biotechnology, Faculty of Life Sciences, Tel  
15 Aviv University, Ramat Aviv, 6997801 Tel Aviv, Israel

16

17 \*Corresponding author:

18 Haibo Huang,

19 Department of Food Science and Technology,

20 Virginia Tech,

21 1230 Washington St. SW,

22 Blacksburg, VA 24061, USA

23 Tel: 1-540-231-0729

24 Fax: 1-540-231-9293

25 E-mail: [huang151@vt.edu](mailto:huang151@vt.edu)

26

27 Yi Wang,

28 Department of Biosystems Engineering,

29 Auburn University,

30 350 Mell Street,

31 Auburn, AL, 36849 USA

32 Tel: 1-334-844-3503

33 Fax: 1-334-844-3530

34 E-mail: [yiwang3@auburn.edu](mailto:yiwang3@auburn.edu)

35

36 #These authors contributed equally to this work.

37

38

39

40

41

42

43 **Abstract**

44 Production of renewable chemicals through biological routes is considered as an urgent  
45 solution for fossil energy crisis. However, endproduct toxicity inhibits microbial performance  
46 and is a key bottleneck for biochemical production. To address this challenge, here we report  
47 an example of biosynthesis of high-value and easy-recoverable derivatives to alleviate  
48 endproduct toxicity and enhance bioproduction efficiency. By leveraging the natural pathways  
49 in solventogenic clostridia for co-producing acyl-CoAs, acids and alcohols as precursors,  
50 through rational screening for host strains and enzymes, systematic metabolic engineering—  
51 including rational organization of ester-synthesizing enzymes inside of the cell, and elimination  
52 of putative prophages, we developed strains that can produce 20.3 g/L butyl acetate and 1.6 g/L  
53 butyl butyrate respectively, which were both the unprecedented levels in microbial hosts.  
54 Techno-economic analysis indicated a production cost of \$986 per metric tonne for butyl  
55 acetate production from corn stover comparing to the market price of \$1,200-1,400 per metric  
56 tonne of butyl acetate, suggesting the economic competitiveness of our developed bioprocess.  
57 Our principles of selecting the most appropriate host for specific bioproduction and engineering  
58 microbial chassis to produce high-value and easy-separable endproducts are highly applicable  
59 to other bioprocesses, and could lead to breakthroughs in biofuel/biochemical production and  
60 general bioeconomy.

61

62 **Keywords:** clostridia, biofuels and biochemicals, fatty acid ester, butyl acetate, butyl butyrate,  
63 CRISPR-Cas9, prophages

64

65 **Main**

66 Although tremendous efforts have been invested for biofuel and biochemical research, it  
67 is still challenging to generate robust microbial strains that can produce target products at  
68 desirable levels<sup>1</sup>. One key bottleneck is the intrinsic toxicity of endproducts to host cells<sup>2</sup>.  
69 Therefore, the production of high-value bioproducts which can be easily recovered from  
70 fermentation might be a solution to tackle the bottleneck in bioproduction. Fatty acid esters, or  
71 mono-alkyl esters, can be used as valuable fuels such as diesel components or specialty  
72 chemicals for food flavoring, cosmetic and pharmaceutical industries<sup>3</sup>. It is projected that the  
73 US market demand for fatty acid esters could reach \$4.99 billion by 2025<sup>4</sup>. In addition, esters,  
74 with fatty acid and alcohol moieties, are generally hydrophobic and can easily separate from  
75 fermentation; thus the production of ester can help mitigate endproduct toxicity to host cells  
76 and efficient bioproduction can be achieved.

77 Conventionally, esters are produced through Fischer esterification which involves high  
78 temperature and inorganic catalysts<sup>5,6</sup>. The reaction consumes a large amount of energy and  
79 generates tremendous wastes, and thus is not environmentally friendly<sup>5</sup>. On the other hand,  
80 ester production through biological routes is becoming more and more attractive because it is  
81 renewable and environmentally benign. There are two primary biological pathways for ester  
82 production: one is through esterification of fatty acid and alcohol catalyzed by lipases<sup>7</sup>, and the  
83 other is based on condensation of acyl-CoA and alcohol catalyzed by alcohol acyl transferases  
84 (AATs)<sup>5</sup>. Previously, lipases from bacteria or fungi have been employed for catalyzing  
85 esterification for ester production<sup>8</sup>. For instance, lipase from *Candida sp.* has been recruited to

86 drive production of butyl butyrate (BB) with *Clostridium tyrobutyricum*. *C. tyrobutyricum*, a  
87 natural hyper-butyrate producer, could generate 34.7 g/L BB with supplementation of lipase  
88 and butanol<sup>9</sup>. However, in such a process, the supplemented enzyme accounts a big cost and  
89 meanwhile the operation needs to be carefully managed to achieve the optimum performance  
90 of esterification<sup>9</sup>. Therefore, a whole microbial cell factory able of ester production in one pot  
91 is highly desired. *Saccharomyces cerevisiae* has been reported to produce various esters with  
92 its native AATs, but generally at very low levels (< 1 g/L)<sup>10</sup>. Rodriguez et al. metabolically  
93 engineered *E. coli* to produce esters by introducing heterologous AATs<sup>5</sup>. Although the  
94 production of some acetate esters can reach decent levels (such as 17.2 g/L isobutyl acetate),  
95 the production of most of the esters was rather low, probably due to the unavailability of  
96 intrinsic substrates/precursors and limited tolerance of *E. coli* to organic endproducts.

97 In this study, we report highly efficient fatty acid ester production to unprecedented levels  
98 using engineered clostridia. We selected solventogenic clostridia to take advantage of their  
99 natural pathways for co-producing acyl-CoAs (acetyl-CoA and butyryl-CoA), fatty acids  
100 (acetate and butyrate), and alcohols (ethanol and butanol), either as intermediates or  
101 endproducts; we hypothesized that clostridia can be excellent microbial platforms to be  
102 engineered for efficient ester production by introducing heterologous AATs and/or lipase genes.  
103 Indeed, through rational screening for host strains (from four well-known clostridial species)  
104 and enzymes (alcohol acyl transferases and lipase), systematic metabolic engineering—  
105 including rational organization of ester-synthesizing enzymes inside of the cell, and elimination  
106 of putative prophages, we ultimately obtained two strains which can produce 20.3 g/L butyl

107 acetate (BA) and 1.6 g/L BB respectively in extractive batch fermentations. These production  
108 levels were both highest in record.

## 109 **Results**

### 110 **Screening of host strains and genes for ester production**

111 We considered clostridia as ideal platforms for ester production thanks to their intrinsic  
112 intermediates (fatty acids, acyl-CoAs, and alcohols) serving as precursors for ester biosynthesis  
113 (Fig. 1). We hypothesized that different flux levels of these precursors within various clostridial  
114 strains would make a big difference for the specific type(s) of ester production. Therefore, we  
115 selected five strains (from four representative species) including *C. tyrobutyricum*  
116  $\Delta cat1::adhE1$ <sup>11</sup>, *C. tyrobutyricum*  $\Delta cat1::adhE2$ <sup>11</sup>, *C. pasteurianum* SD-1<sup>12</sup>, *C.*  
117 *saccharoperbutylacetonicum* N1-4-C<sup>13</sup> and *C. beijerinckii* NCIMB 8052<sup>14</sup> to evaluate their  
118 capabilities for ester production through metabolic engineering (Table S1). We included both  
119 *C. tyrobutyricum*  $\Delta cat1::adhE1$  and  $\Delta cat1::adhE2$  here because they produce different levels  
120 (and thus ratios) of butanol and ethanol<sup>11,15</sup>. Esters can be synthesized either through  
121 esterification of acid and alcohol catalyzed by lipase, or through condensation of acyl-CoA and  
122 alcohol catalyzed by AATs (Fig. 1). Previously, lipase B (CALB) from *Candida antarctica* has  
123 been employed for efficient ester production through esterification<sup>9,16</sup>. In addition, four AATs  
124 including VAAT<sup>17,18</sup>, SAAT<sup>17</sup>, ATF1<sup>3,10</sup>, EHT1<sup>19</sup> have been recruited for ester production in  
125 various hosts<sup>5,20-22</sup>. Therefore, here, we evaluated all these genes in our clostridial hosts for  
126 ester production.

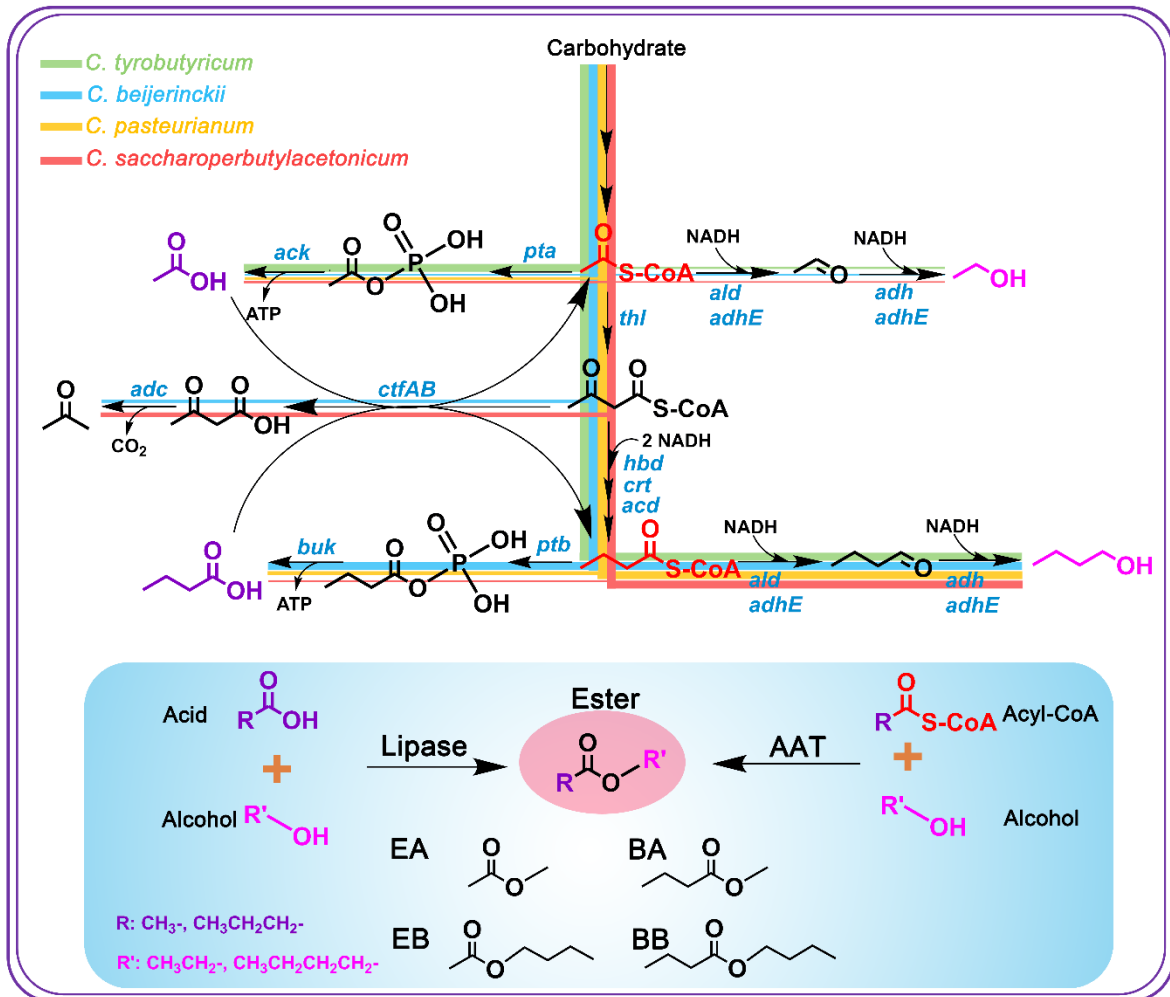

**Fig. 1 Engineering of solventogenic clostridia for fatty acid ester production.** **Top:** Five strains out of four representative clostridial species were selected and evaluated as the host to be engineered for ester production in this study. We hypothesized that the different metabolic fluxes within different strains would make a big difference for the desirable ester production. The metabolic pathways of the four different species were represented in four different colors. **Bottom:** Fatty acid esters could be synthesized through two primary biological pathways: one is through the esterification of fatty acid and alcohol catalyzed by lipases, and the other is through the condensation of acyl-CoA and alcohol catalyzed by alcohol acyl transferases (AATs). Key genes in the pathway: *pta*, phosphotransacetylase; *ack*, acetate kinase; *thl*, thiolase; *hbd*, beta-hydroxybutyryl-CoA dehydrogenase; *crt*, crotonase; *bcd*, butyryl-CoA dehydrogenase; *adh*, alcohol dehydrogenase; *adhE*, Aldehyde-alcohol dehydrogenase; *adc*, acetoacetate decarboxylase; *ctfAB*, CoA transferase; *ptb*, phosphotransbutyrylase; *buk*, butyrate kinase; *ald*, aldehyde dehydrogenase.

127 Six plasmids (pMTL- $P_{car}$ -*vaat*, pMTL- $P_{car}$ -*saat*, pMTL- $P_{car}$ -*atf1*, pMTL- $P_{car}$ -*eht1*, pMTL-  
 128  $P_{car}$ -*lipaseB* as well as pMTL82151 as the control) were individually transformed into *C.*  
 129 *saccharoperbutylacetonicum* N1-4-C, *C. pasteurianum* SD-1, *C. tyrobutyricum* *cat1::adhE1*  
 130 and *cat1::adhE2* respectively. While pTJ1- $P_{car}$ -*vaat*, pTJ1- $P_{car}$ -*saat*, pTJ1- $P_{car}$ -*atf1*, pTJ1- $P_{car}$ -  
 131 *eht1* and pTJ1- $P_{car}$ -*lipaseB* as well as pTJ1 were transformed into *C. beijerinckii* 8052.

132 Fermentations were performed (Fig. 2a), and results were shown in Fig. 2b. Four types of esters  
133 were detected: EA, BA, ethyl butyrate (EB) and BB. Interestingly, control strains with the  
134 empty plasmid (pMTL82151 or pTJ1) also produced noticeable EA, BA and BB. This could  
135 be because: 1) the endogenous lipase in clostridia can catalyze ester production<sup>13</sup>; 2) *catP* on  
136 pMTL82151 encoding a chloramphenicol acetyltransferase (belonging to the same class of  
137 enzymes as AATs) has AAT activities<sup>5,23</sup>.

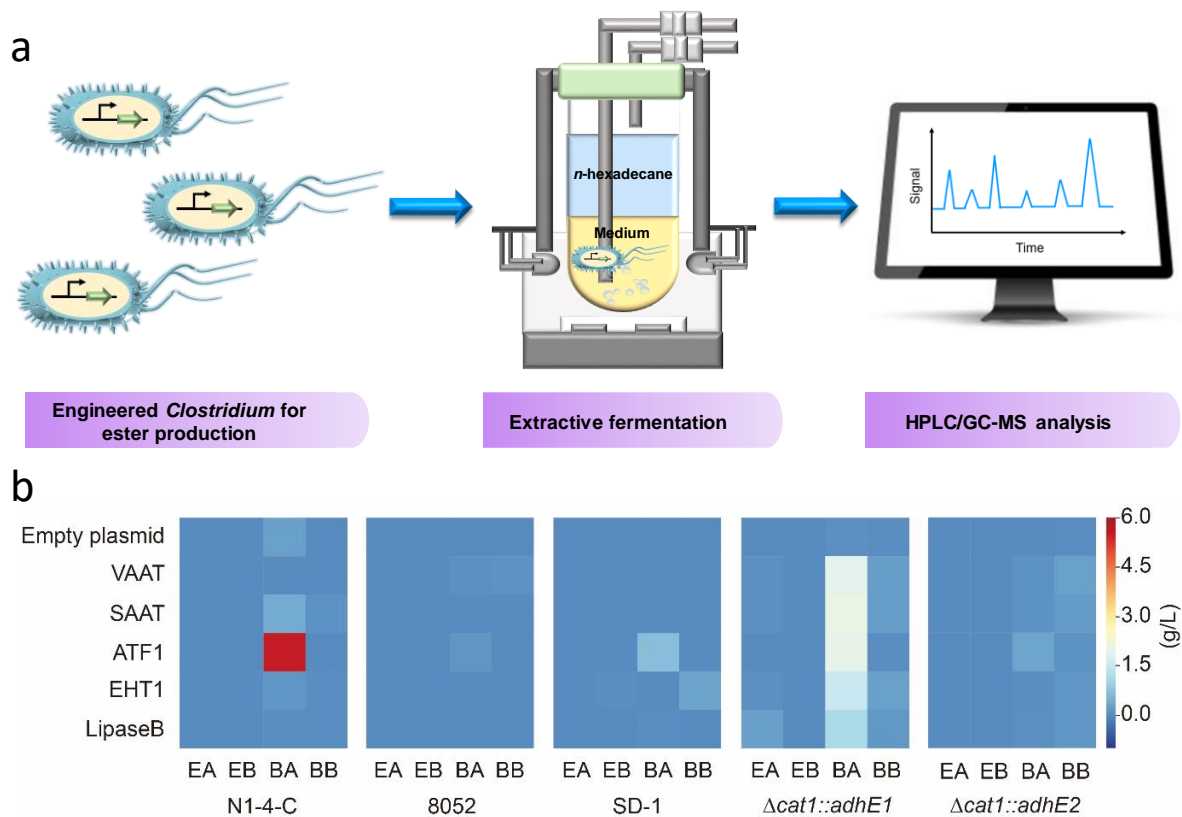

**Fig. 2 Screening of strains and enzymes for ester synthesis.** (a) Schematic representation of devices and procedures for ester fermentation with serum bottle. (b) Heatmap results showed the ester production in various *Clostridium* strains with the overexpression of different enzymes. Empty plasmid: overexpression of pMTL82151 (for *C. saccharoperbutylacetonicum* N1-4-C, *C. pasteurianum* SD-1, *C. tyrobutyricum* *cat1::adhE1* and *cat1::adhE2*) or pTJ1 (for *C. beijerinckii* 8052) as the control; EA: ethyl acetate; EB: ethyl butyrate; BA: butyl acetate; BB: butyl butyrate. Scale bar on the right is in g/L.

138 Based on the results, it could be concluded that ATF1 is more favorable for BA production.  
139 All strains with *atf1* produced higher levels of BA compared to the same strain but with the  
140 overexpression of other genes (Fig. 2b). While VAAT, SAAT and EHT1 seemed to have better  
141 activities for BB production. Among all the strains, *C. saccharoperbutylacetonicum* FJ-004



142 produced the highest titer of 5.5 g/L BA. This is the highest BA production that has ever been  
143 reported through microbial fermentation. *C. acetobutylicum* CaSAAT (with the overexpression  
144 of *saat* from *Fragaria xananassa*) was reported to produce 8.37 mg/L BA<sup>22</sup>. While this  
145 manuscript was prepared, a newly engineered *C. diolis* strain was reported to produce 1.37 g/L  
146 BA<sup>24</sup>. The highest BB production of 0.3 g/L was observed in *C. pasteurianum* J-5 with the  
147 overexpression of *eht1*. This is also the highest BB production reported so far directly from  
148 glucose with engineered microorganisms, which is significantly higher than the recently  
149 reported 50.07 mg/L in an engineered *C. acetobutylicum*<sup>22</sup>. Couple of our engineered strains  
150 could also produce small amount of EB with the highest of 0.02 g/L been observed in *C.*  
151 *pasteurianum* J-5. With the *lipaseB* overexpression, *C. tyrobutyricum* JZ-6 could generate 0.3  
152 g/L EA. This was significantly higher than other strains tested in this work (mostly < 0.01 g/L).  
153 As we reported previously, the mother strain *C. tyrobutyricum*  $\Delta cat1::adhE1$  could produce  
154 20.8 g/L acetate and 5.3 g/L ethanol (precursors for EA synthesis) during a batch fermentation,  
155 which might have enabled high-level EA production in *C. tyrobutyricum* JZ-6<sup>11</sup>.

156 The production levels of BA and BB achieved above are both significantly higher than the  
157 previously reported in microbial hosts. In comparison, the BA level is much higher than BB  
158 level, and thus has greater potentials towards economic viability. Therefore, in the following  
159 steps, we primarily focused on systematic metabolic engineering of the strain for further  
160 enhanced BA production.

161

### 162 **Deletion of *nuoG* increased BA production**

163 Enhancement of the pool of precursors is one common strategy to improve the production  
164 of targeted bioproduct. Butanol and acetyl-CoA are the two precursors for BA production.  
165 Therefore, we set out to increase butanol synthesis to improve BA production. The *nuoG* gene

166 encodes the NADH-quinone oxidoreductase subunit G, which is a subunit of the electron  
167 transport chain complex I<sup>25</sup>. NADH-quinone oxidoreductase can oxidize NADH to NAD<sup>+</sup> and  
168 transfer protons from cytoplasm to periplasm to form a proton gradient between periplasm and  
169 cytoplasm, which can then contribute to the energy conversion<sup>25</sup> (Fig. S1). It has been reported  
170 that inactivation of *nuoG* could increase both glucose consumption and butanol production in  
171 *C. beijerinckii*<sup>26</sup>. In this study, we hypothesized that by deleting *nuoG*, BA production would  
172 be boosted because of the potentially increased butanol production. Thus, we deleted *nuoG*  
173 (*Cspa\_c47560*) in N1-4-C and generated FJ-100. Further, FJ-101 was constructed based on FJ-  
174 100 for BA production. Results demonstrated that, although butanol production in FJ-100 was  
175 only slightly improved (16.5 g/L vs. 15.8 g/L in N1-4-C; Fig. S2), BA production in FJ-101  
176 was remarkably enhanced compared to FJ-004 (7.8 g/L vs. 5.5 g/L). Based on our experiences,  
177 because *C. saccharoperbutylacetonicum* N1-4 (or N1-4-C) mother strain can naturally produce  
178 very high level butanol, it was generally very difficult to further improve butanol production  
179 in *C. saccharoperbutylacetonicum* through simple metabolic engineering strategies<sup>27</sup>. This is  
180 likely the case in FJ-100 (comparing to N1-4-C). However, the increased NADH availability  
181 with *nuoG* deletion in FJ-101 would enable an enhanced ‘instant’ flux/availability of butanol  
182 which would serve as a precursor for BA production and thus enhance BA production in FJ-  
183 101. In this sense, the total butanol generated during the process (including the fraction serving  
184 as the precursor for BA production and the other fraction as the endproduct) in FJ-101 would  
185 be actually much higher than in FJ-004.

186

### 187 **Enhancement of acetyl-CoA availability to improve BA production**

188 At the end of fermentation with FJ-101, there was still 7.6 g/L of butanol remained. This  
189 suggested that limited availability of intracellular acetyl-CoA was likely the bottleneck for the

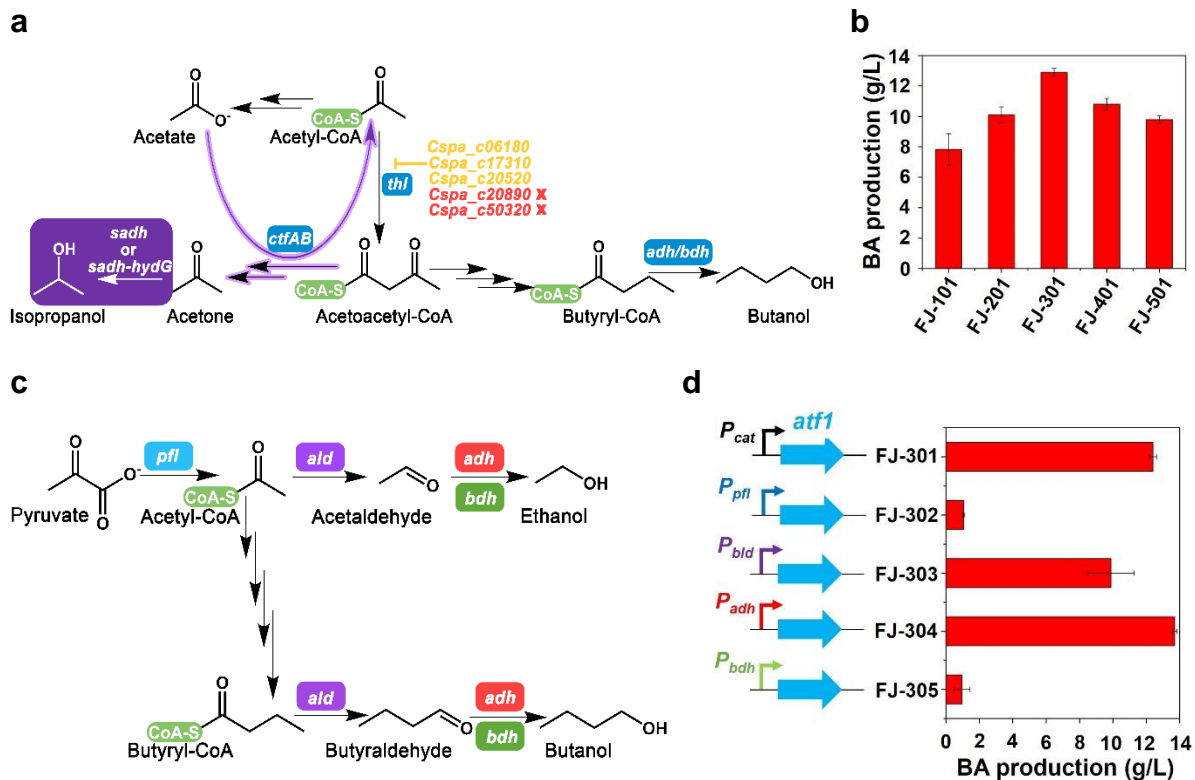

**Fig. 3 Enhancing BA production through increasing the availability of acetyl-CoA (a & b) and dynamically expressing the *atf1* gene (c & d).** (a) Introduction of isopropanol synthesis pathway (shaded in purple) and deletion of thiolase genes. The pathways in purple arrows represent the ‘regeneration’ of acetyl-CoA. There are five annotated genes encoding thiolase in *C. saccharoperbutylacetonicum*, only two (in red) of which could be deleted (see Supplementary materials). (b) The fermentation results for BA production with various mutant strains corresponding to the genetic manipulations in (a). The reported value is mean  $\pm$  SD. (c) Four promoters associated with the biosynthesis of acetyl-CoA or alcohols in the pathway were selected to drive the expression of *atf1*. (d) The fermentation results for BA production with various mutant strains in which different promoters were used to drive the expression of *atf1* as illustrated in (c). The reported value is mean  $\pm$  SD. BA: butyl acetate. Key genes in the pathway: *adh*, alcohol dehydrogenase; *bdh*, butanol dehydrogenase; *ctfAB*, CoA transferase; *sadh*, secondary alcohol dehydrogenase; *hydG*, putative electron transfer protein; *pfl*, pyruvate formate lyase; *ald*, aldehyde dehydrogenase.

190 further improvement of BA production. To enhance the availability of acetyl-CoA, we firstly  
 191 introduced isopropanol synthesis (from acetone) pathway (Fig. 3a). We hypothesized that this  
 192 could pull flux from acetone to isopropanol, and thus boost the transferring of CoA from  
 193 acetoacetyl-CoA to acetate driven by the CoA transferase, resulting in increased instant  
 194 availability of acetyl-CoA. The *sadh* gene in *C. beijerinckii* B593 encoding a secondary alcohol  
 195 dehydrogenase can convert acetone into isopropanol<sup>28</sup>. The *hydG* gene in the same operon as  
 196 *sadh* encodes a putative electron transfer protein. It has been demonstrated to play important

197 roles for the conversion of acetone into isopropanol<sup>29,30</sup>. In this study, either *sadh* alone or the  
198 *sadh-hydG* gene cluster was integrated into the chromosome of FJ-100, generating FJ-200 and  
199 FJ-300, respectively. Further, by introducing pMTL-*cat-atf1*, FJ-201 and FJ-301 were obtained.  
200 Compared to FJ-101, about 50% of the acetone could be converted into isopropanol in FJ-201,  
201 while ~95% of the acetone in FJ-301 could be converted into isopropanol. The total titers of  
202 acetone plus isopropanol in FJ-301 and FJ-201 were 6.6 and 5.1 g/L respectively, both of which  
203 were higher than 4.8 g/L acetone in FJ-101. More significantly, BA production in FJ-201 and  
204 FJ-301 has been remarkably increased compared to FJ-101, and reached 10.1 and 12.9 g/L,  
205 respectively, likely due to enhanced ‘regeneration’ of acetyl-CoA as described above (Fig. 3b).

206

### 207 **Dynamic expression of *atf1* enhanced BA production**

208 In our engineered strain, BA is synthesized through condensation of butanol and acetyl-  
209 CoA catalyzed by ATF1. The constitutively high expression of ATF1 would not necessarily lead  
210 to high BA production. For example, BA production in FJ-008 in which *atf1* was driven by the  
211 constitutive strong promoter  $P_{thl}$  from *C. tyrobutyricum* was actually much lower (3.5 g/L vs  
212 5.5 g/L) than in FJ-004 in which *atf1* was expressed under the promoter  $P_{cat}$  from *C.*  
213 *tyrobutyricum*. We hypothesized that, in order to obtain more efficient BA production, the  
214 synthesis of ATF1 should be dynamically controlled and thus synchronous with the synthesis  
215 of precursors (butanol or acetyl-CoA). Therefore, for the next step, we attempted to evaluate  
216 various native promoters for *atf1* expression, and identify the one(s) that can enable an  
217 appropriately dynamic expression of ATF1 and lead to enhanced BA production.

218 Four promoters associated with the synthesis of BA precursors were selected to drive the  
219 *atf1* expression, and four strains were constructed correspondingly for BA production (Fig. 3c).

220 Fermentation results were shown in Fig. 3d. Indeed, distinct results for BA production were  
221 observed in these strains. The BA level was only 1.0 and 1.1 g/L in FJ-305 and FJ-302 with  
222  $P_{bdh}$  and  $P_{pfl}$  for *atfl* expression, respectively.  $P_{ald}$  is an important promoter in *C.*  
223 *saccharoperbutylaceticum*, which can sense the acidic state and switch cell metabolism from  
224 acidogenesis to solventogenesis<sup>31</sup>. FJ-303 with the *atfl* expression driven by  $P_{ald}$  produced 9.9  
225 g/L BA, which was still 20% lower than in FJ-301. Interestingly, FJ-304 in which *atfl* was  
226 expressed under  $P_{adh}$  produced 13.7 g/L BA, which was about 10.5% higher than in FJ-301.  
227 Based on the results, we speculated that the promoter of *adh* (which encodes the key enzyme  
228 catalyzing butanol and ethanol production) might have resulted in the more appropriate  
229 dynamic expression of *atfl* in line with the flux of the precursors and thus led to enhanced BA  
230 production. On the other hand, ethanol production in FJ-304 was also lower than in FJ-301 (0.3  
231 g/L vs 0.6 g/L). The enhanced BA production in FJ-304 consumed more acetyl-CoA, and thus  
232 decreased production of ethanol, which also needed acetyl-CoA as the precursor.

233

### 234 **Rational organization of BA-synthesis enzymes to enhance BA production**

235 Rational organization of enzymes associated with the synthesis of target product is an  
236 effective strategy to improve the bioproduction<sup>32</sup>. In this study, we evaluated several such  
237 approaches to increase BA production (Fig. 4).

238 PduA\* protein, derived from *Citrobacter freundii* Pdu bacterial microcompartment could  
239 form filaments in bacteria like *E. coli*<sup>32</sup>. The CC-Di-A and CC-Di-B are designed parallel  
240 heterodimeric coiled coils and two proteins with each of these self-assembling tags could  
241 combine and shorten the catalytic distance. The enzymes (from the same metabolic pathway),  
242 tagged with one of the coiled coils (CC-Di-A or CC-Di-B) would attach onto the formed  
243 intracellular filaments (its PduA\* was tagged by the other coiled coil); thus, the organized

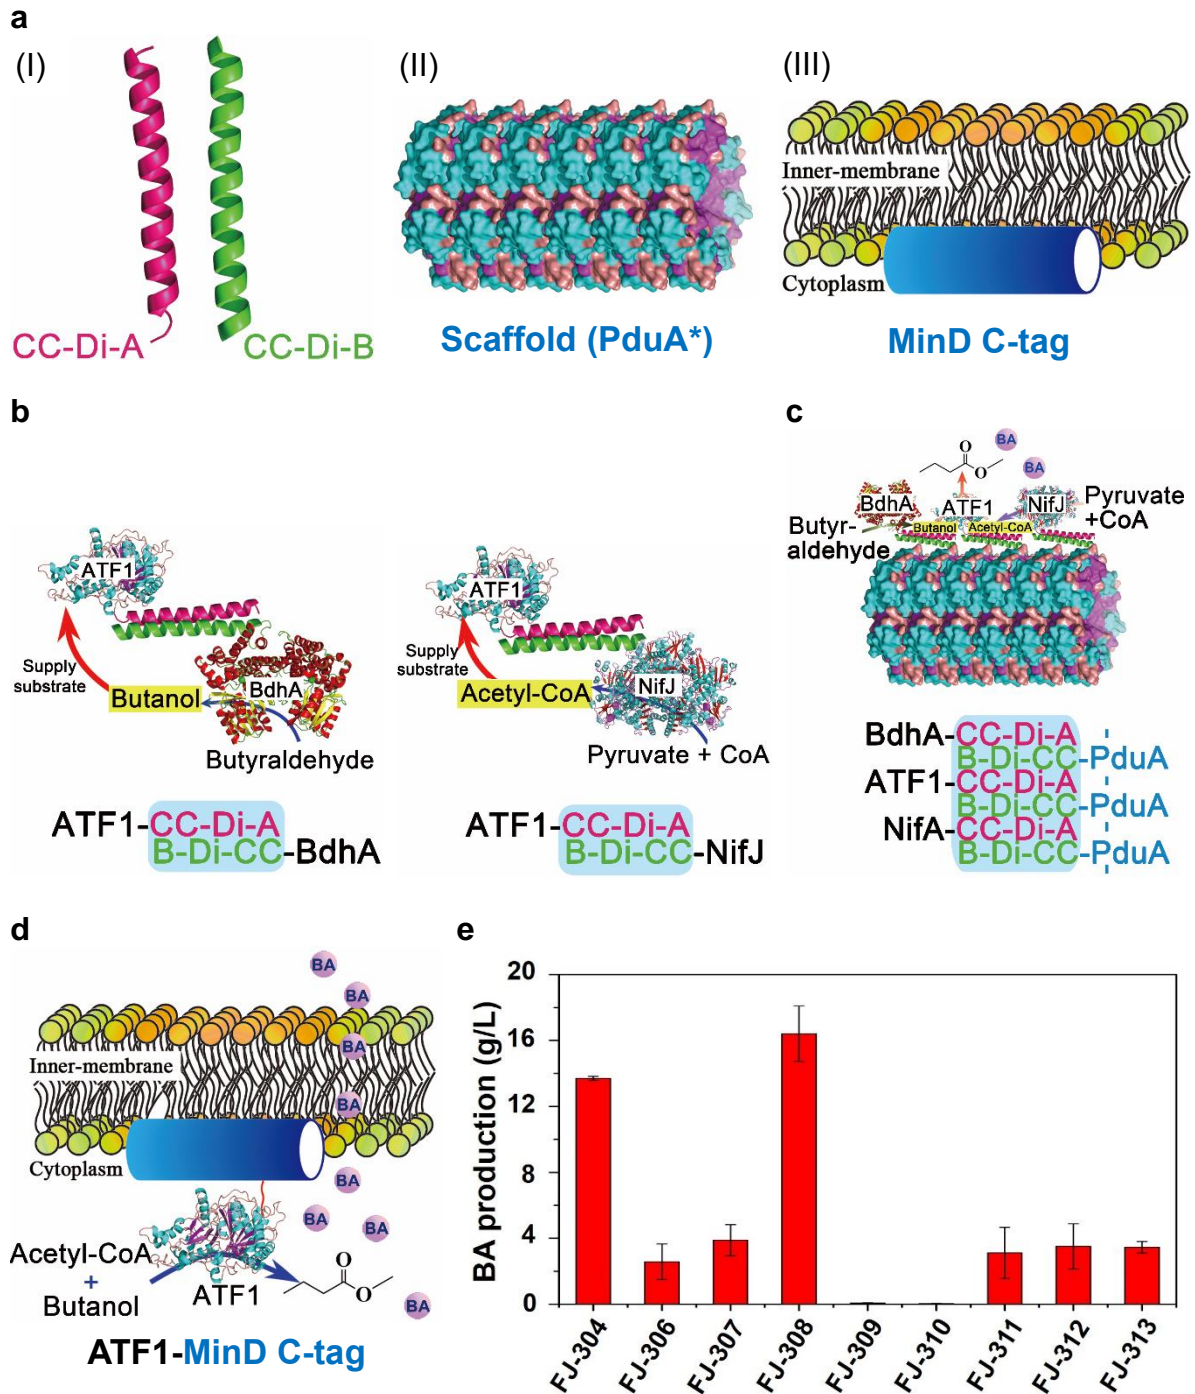

**Fig. 4 Enhancing BA production through rational organization of the enzymes associated with BA synthesis.** (a) Biological components evaluated in this study for rational organization of enzymes: (I) CC-Di-A and CC-Di-B tags, (II) PduA\* scaffold, (III) MinD C-tag. (b) Schematic representation of assembling two of the three enzymes for BA synthesis with the CC-Di-A and CC-Di-B tags. (c) Schematic representation of organizing the three enzymes for BA synthesis onto the PduA\* formed scaffold. (d) Schematic representation of using the MinD C-tag to draw ATF1 onto the cell membrane. (e) The fermentation results for BA production with various mutant strains corresponding to the genetic manipulations from (b)-(d). The reported value is mean  $\pm$  SD. BA: butyl acetate.

244 enzymes on the filaments would improve the catalytic efficiency of the target metabolic

245 pathway. MinD is a membrane-associated protein and the localization of MinD is mediated by  
246 an 8-12 residue C-terminal membrane-targeting sequence. The proteins with MinD C-terminal  
247 sequence were able to be drawn to the cell membrane<sup>32,33</sup>. Thus, the application of MinD C-tag  
248 can facilitate the secretion of target product and enhance its production by mitigating the  
249 intracellular toxicity as well as promoting the catalyzing process (Fig. 4a).

250 To evaluate whether the organization of enzymes could improve BA production in our  
251 strain, three strategies were recruited: 1) assembling two of the three enzymes (enzymes  
252 associated with BA synthesis: NifJ (related to acetyl-CoA synthesis), BdhA (related to butanol  
253 synthesis) and ATF1) with the CC-Di-A and CC-Di-B tags; 2) organizing the three enzymes  
254 onto PduA\* formed scaffold; or 3) introducing MinD C-tag to draw ATF1 onto the cell  
255 membrane.

256 Firstly, we assembled enzymes for BA synthesis by adding the CC-Di-A tag to ATF1 and  
257 the CC-Di-B tag to NifJ and BdhA (Fig. 4b). Fermentation results showed that the addition of  
258 CC-Di-A tag to the C-terminus of ATF1 in FJ-306 had significantly negative effects on BA  
259 synthesis with only 2.6 g/L BA was produced (Fig. 4e). The assembly of ATF1 together with  
260 NifJ or BdhA had even severer negative effects on BA synthesis and BA production was only  
261 0.06 and 0.03 g/L in FJ-309 and FJ-310, respectively. Further, we organized ATF1, NifJ and  
262 BdhA onto the PduA\* scaffold. PduA\* was tagged with CC-Di-B, while the other three  
263 enzymes were tagged with CC-Di-A (Fig. 4c). The generated FJ-311 (harboring the scaffold  
264 and ATF1-CC-Di-A) produced 3.1 g/L BA, while FJ-312 (harboring the scaffold, ATF1-CC-  
265 Di-A and NifJ-CC-Di-A) and FJ-313 (harboring the scaffold, ATF1-CC-Di-A, NifJ-CC-Di-A  
266 and BdhA-CC-Di-A) produced slightly higher amount of BA both at 3.5 g/L. The scaffold  
267 seemed to have some positive effects on BA synthesis but didn't work as efficient as it was  
268 reported in other studies<sup>32</sup>. We speculate that the coiled coils tags (CC-Di-A or CC-Di-B) might

269 severely impair the catalytic activity of ATF1. Furthermore, the assembly of ATF1 together  
270 with NifJ or BdhA could further inhibit the activity of ATF1, thus resulting in significant  
271 decrease in BA production in the corresponding strains.

272 Moreover, we evaluated the effect of the introduction of MinD C-tag (to draw ATF1 onto  
273 the cell membrane) on BA production (Fig. 4d). Fermentation results showed that the  
274 corresponding FJ-308 strain could produce 16.4 g/L BA, which was 20% higher than FJ-304  
275 (Fig. 4e). The FJ-307 strain (with CC-Di-A-Atf1-*MinD*) could also produce higher BA of 3.9  
276 g/L compared to FJ-306 (2.6 g/L). All these results indicated that the addition of the cell  
277 membrane associated motif to draw ATF1 onto the cell membrane could facilitate the BA  
278 excretion and mitigate the intracellular toxicity and therefore enhance BA production.  
279 However, the assembly of BA synthetic enzymes or the organization of relevant enzymes onto  
280 the scaffold would significantly decrease BA production.

281

## 282 **Elimination of prophages increased BA (and BB) production**

283 During our fermentations, we noticed that the ester production of the strains was not stable  
284 and could be varied from batch to batch. Our industrial collaborator also observed that *C.*  
285 *saccharoperbutylacetonicum* often had instable performance for butanol production in  
286 continuous fermentations (data not shown). It has been reported that the N1-4 (HMT) strain  
287 contains a temperate phage named HM T which could release from the chromosome even  
288 without induction<sup>34</sup>. In addition, the N1-4 (HMT) strain can produce a phage-like particle  
289 clostocin O upon the induction with mitomycin C<sup>35</sup>. We hypothesized that the instability of  
290 fermentations with *C. saccharoperbutylacetonicum* might be related to the prophages, and the  
291 deletion of prophages would enable more stable and enhanced production of desired  
292 endproducts. We identified five prophage-like genomes (referred here as P1-P5 respectively)



293 within the chromosome of N1-4 (HMT) (Fig. 5a)<sup>36</sup>. Based on systematic evaluation through  
 294 individual and combinatory deletion of the prophages, we demonstrated that P5 is responsible  
 295 for the clostocin O synthesis (Figs. 5f, h & S5)<sup>35</sup>, and further confirmed that P1 was the HMT  
 296 prophage genome (Figs. 5g & S7). However, the phage image was different from what was  
 297 described before<sup>37</sup>. It was more like HM 7 (a head with a long tail), rather than HM 1 (a head

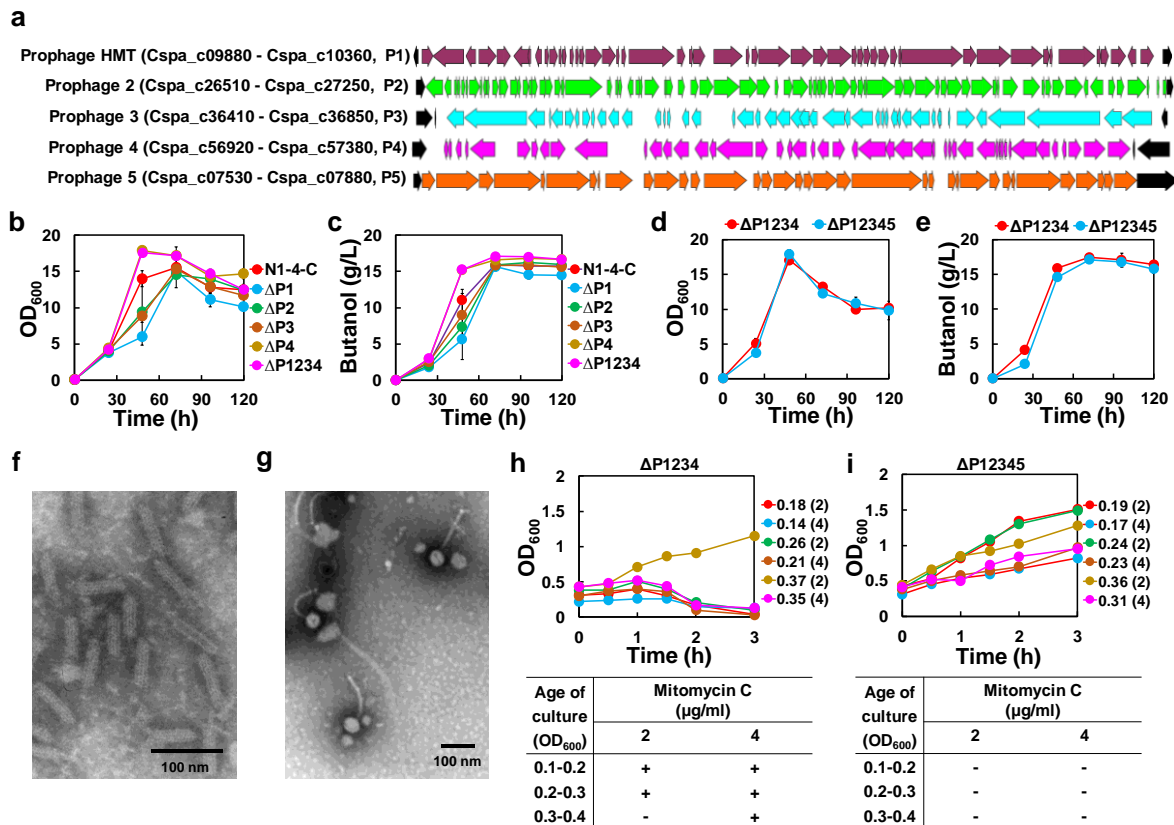

**Fig. 5 The deletion of the prophage genomes.** (a) The gene cluster organization of the HMT prophage (P1) and another four putative prophages (P2-P5). (b) Comparison of the cell growth of prophage deleted mutants and the control N1-4-C strain. (c) Comparison of the butanol production in prophage deleted mutants and the control N1-4-C strain. (d) Comparison of the cell growth between ΔP1234 and ΔP12345. (e) Comparison of butanol production between ΔP1234 and ΔP12345; (f) Transmission electron microscopy image of clostocin O; (g) Transmission electron microscopy image of the HMT prophage particles; (h, i) Cell growth profiles of ΔP1234 and ΔP12345 with the induction (at various OD<sub>600</sub>) using mitomycin C at 2 or 4 μg/ml. “-” indicates that there was no cell lysis; “+” indicates that most of the cells were lysed. The value at the right side of the cell growth profile figure represents the actual OD<sub>600</sub> value at which mitomycin C (with the applied concentration included in the parentheses) was added for the induction.

298 with multiple short tails). This is the first time that an image of the HMT phage has been  
 299 reported. Both ΔP1234 (with the deletion of P1-P4) and ΔP12345 (with the deletion of P1-P5)  
 300 exhibited improved cell growth and enhanced butanol production (Figs. 5b-5e, Figs. S3, S8 &

301 S9).  $\Delta$ P12345 should be a more stable platform as there is no cell lysis at any induction  
302 conditions with mitomycin C or norfloxacin (Fig. 5i). While  $\Delta$ P1234 showed similar growth  
303 and even slightly higher butanol production compared to  $\Delta$ P12345 (Figs. 5d & 5e).

304 Thus, in a further step, we used  $\Delta$ P1234 and  $\Delta$ P12345 as the platform to be engineered for  
305 enhanced and more stable BA production. We deleted *nouG* and integrated *sadh-hydG* cluster  
306 in both  $\Delta$ P1234 and  $\Delta$ P12345, and obtained FJ-1200 and FJ-1300 correspondingly. The  
307 plasmid pMTL- $P_{adh}$ -*atfI*-*MinD* was transformed into FJ-1200 and FJ-1300, generating FJ-1201  
308 and FJ-1301, respectively. Fermentation results showed that FJ-1201 and FJ-1301 produced  
309 19.7 g/L and 19.4 g/L BA, respectively, which were both higher than FJ-308 (Fig. 6a & Table  
310 S3). BA production in both FJ-1201 and FJ-1301 could be completed within 48 h, resulting in  
311 a productivity of ~0.41 g/L/h, which was significantly higher than 0.23 g/L/h in FJ-308. BA  
312 yield in FJ-1201 reached 0.26 g/g, which was also higher than FJ-308 (0.24 g/g). We further  
313 determined BA concentrations in the fermentation broth as 0.6 g/L and 0.5 g/L respectively for  
314 the fermentation with FJ-1201 and FJ-1301. Taken together, total BA production in FJ-1201  
315 was 20.3 g/L, which was the highest level that has ever been reported in a microbial host. It is  
316 2400-fold higher than the highest level that has been previously reported<sup>22</sup>, and also 14.8-fold  
317 higher than that by the very recently reported *C. diolis* strain<sup>24</sup>.

318 Besides BA production, BB production in FJ-1201 also reached 0.9 g/L, which was  
319 significantly higher than in FJ-308 (0.01 g/L) and in *C. pasteurianum* J-5 (0.3 g/L) (Fig. 2b,  
320 Fig. 6a, & Table S3). This level (0.9 g/L) was 18.6-fold higher than the highest BB production  
321 that has been previously reported (0.05 g/L in *C. acetobutylicum*)<sup>22</sup>. All these results confirmed  
322 our hypothesis that the elimination of prophages would make more robust host strain for  
323 enhanced and more stable ester production.

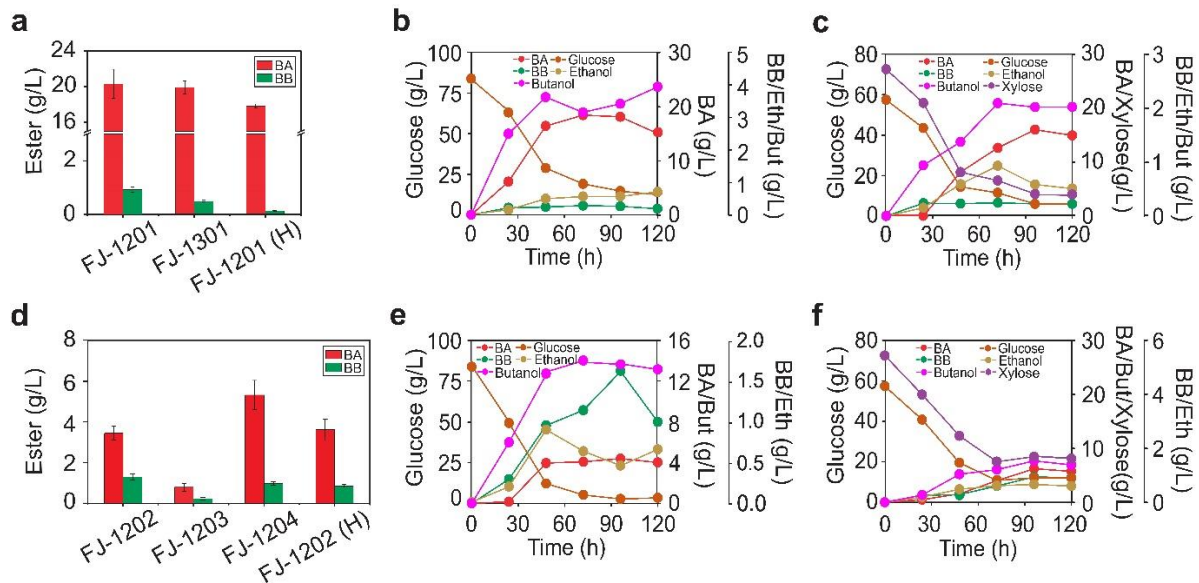

**Fig. 6 Fermentation results of the engineered strains for fatty acid ester production.** (a) BA production in serum bottles using glucose (FJ-1201 and FJ-1301) or biomass hydrolysates (FJ-1201 (H)) as the substrate. (b) BA fermentation kinetics in FJ-1201 in 500-mL bioreactor using glucose as the substrate. (c) BA fermentation kinetics in FJ-1201 in 500-mL bioreactor using biomass hydrolysates as the substrate. (d) BB production in serum bottles using glucose (FJ-1202, FJ-1203, and FJ-1204) or biomass hydrolysates (FJ-1202 (H)) as the substrate. (e) BB fermentation kinetics in FJ-1202 in 500-mL bioreactor using glucose as the substrate. (f) BB fermentation kinetics in FJ-1202 in 500-mL bioreactor using biomass hydrolysates as the substrate. BA: butyl acetate; BB: butyl butyrate; Eth: ethanol; But: butanol.

### 324 Expression of SAAT in FJ-1200 further enhanced BB production

325 As demonstrated in Fig. 2b, SAAT and EHT1 were more relevant for BB production.  
 326 Therefore, to achieve higher BB production, we expressed *saat* and *ehl1* in FJ-1200 and  
 327 obtained FJ-1202 and FJ-1203, respectively. Fermentation showed that FJ-1202 and FJ-1203  
 328 produced 1.3 and 0.2 g/L BB, respectively (Fig.6d). Further, we added MinD C-tag to the SAAT  
 329 and introduced the recombinant gene into FJ-1200 and obtained FJ-1204 for an attempt to  
 330 further improve BB production as observed for BA production in FJ-308. However, BB  
 331 production in FJ-1204 was only 1.0 g/L. Notwithstanding, 1.3 g/L BB obtained in FJ-1202 is  
 332 25.8-fold higher than the highest level that has been previously reported<sup>22</sup>.

333

### 334 Ester production with biomass hydrolysates as substrate

335 Fermentations were carried out using biomass hydrolysates as the substrate. In the

336 hydrolysates, besides sugars (57.4 g/L glucose and 27.2 g/L xylose) as carbon source, there  
337 were also nutrients converted from biomass (corn stover). Therefore, we tested the effect of  
338 organic nitrogen (yeast and tryptone) of various levels on ester production. Interestingly, results  
339 showed that the highest BA production of 17.5 g/L was achieved in FJ-1201 (in the extractant  
340 phase) without any exogenous nitrogen source supplemented (Table S4). In addition, 0.3 g/L  
341 BA was detected in aqueous phase, making a total BA production of 17.8 g/L in FJ-1201 (Fig.  
342 6a & Table S4). Although this was slightly lower than when glucose was used as substrate (20.3  
343 g/L), fermentation with hydrolysates did not need any supplementation of nutrients, which  
344 could significantly reduce production cost. We further performed fermentation in 500-mL  
345 bioreactor with pH controlled >5.0. BA production reached 16.0 g/L with hydrolysates and  
346 18.0 g/L with glucose as substrate, both of which were lower than results from fermentation  
347 under the same conditions but with serum bottles (Figs. 6b & 6c). During bioreactor  
348 fermentation, we noticed very strong smell of BA around the reactor. We suspected that  
349 significant evaporation during fermentation with bioreactor resulted in the lower level of final  
350 BA titers as compared to fermentation with serum bottle, which was securely sealed with only  
351 minimum outlet for releasing gases. An improved bioprocess needs to be carefully designed  
352 for larger scale fermentation to minimize BA evaporation and enhance BA production and  
353 recovery.

354 Furthermore, we performed fermentation with FJ-1202 for BB production using  
355 hydrolysates in both serum bottle and 500-mL bioreactor. Results demonstrated that BB  
356 production in serum bottle from hydrolysates was 0.9 g/L (compared to 1.3 g/L when glucose  
357 used as substrate; Fig. 6d). BB production in bioreactor from hydrolysates reached 0.9 g/L  
358 compared to 1.6 g/L when glucose was used as substrate (Figs. 6e & 6f). The results were  
359 consistent with the case for BA production that lower-level BB was obtained when hydrolysates

360 (compared to glucose) was used as substrate. However, interestingly, larger scale fermentation  
361 with bioreactor produced slightly higher level of BB than the fermentation under the same  
362 conditions with serum bottle, which was different from the case for BA production. This might  
363 be because BB is less evaporative (in bioreactor) than BA.

364

### 365 **Techno-economic analysis (TEA) for BA production from biomass hydrolysates**

366 We performed a techno-economic analysis (TEA) to evaluate the economic  
367 competitiveness of BA production from corn stover at a process capacity of 2,500 MT wet corn  
368 stover (20% moisture) per day. The whole process was developed based on the previous process  
369 using the deacetylation and disk refining (DDR) pretreatment to produce corn stover  
370 hydrolysate<sup>38</sup>, which was the substrate used for our fermentation experiments to produce BA.  
371 The detailed process information is summarized in the supplementary materials. The process  
372 is composed of eight sections including feedstock handling, DDR pretreatment and hydrolysis,  
373 BA fermentation, product recovery (distillation), wastewater treatment, steam and electricity  
374 generation, utilities, and chemical and product storage (Fig. 7a). Fig. 7b shows the equipment  
375 cost distribution of each process sections, with a total installed equipment cost of \$263 million.  
376 The fermentation, steam & electricity co-generation, and wastewater treatment contribute  
377 significant percentage to the total installed equipment cost, which aligns well with previous  
378 TEA models for chemical production from biomass via fermentation<sup>39,40</sup>. The total capital  
379 investment (TCI) is \$472 million by taking consideration of additional direct cost, indirect cost  
380 as well as working capitals (Table S5). From the process model, 95.2 kg of BA can be produced  
381 from 1 MT of corn stover, meanwhile significant amounts of butanol (11.1 kg), isopropanol  
382 (15.5 kg) and surplus electricity (209 kWh) are produced as coproducts (Fig. 7c). The BA  
383 production cost was estimated to be \$986/MT (Fig. 7d), which is much lower than the current

384 BA market price ranging between \$1,200 and \$1,400 per MT in year 2019 (based on the quotes  
 385 from the industry<sup>41</sup>), showing the highly economic competitiveness of BA production using  
 386 our engineered strain. By looking into the cost breakdown, the corn stover feedstock cost  
 387 contributes the most (38.2%) to the BA production cost, followed by other chemicals (22.3%)  
 388 and capital deprecation (18.0%) and utilities (14.5%). Sensitivity analysis shows that corn  
 389 stover price, BA yield, and BA titer are the most sensitive input parameters to the BA  
 390 production cost (Fig. S10).

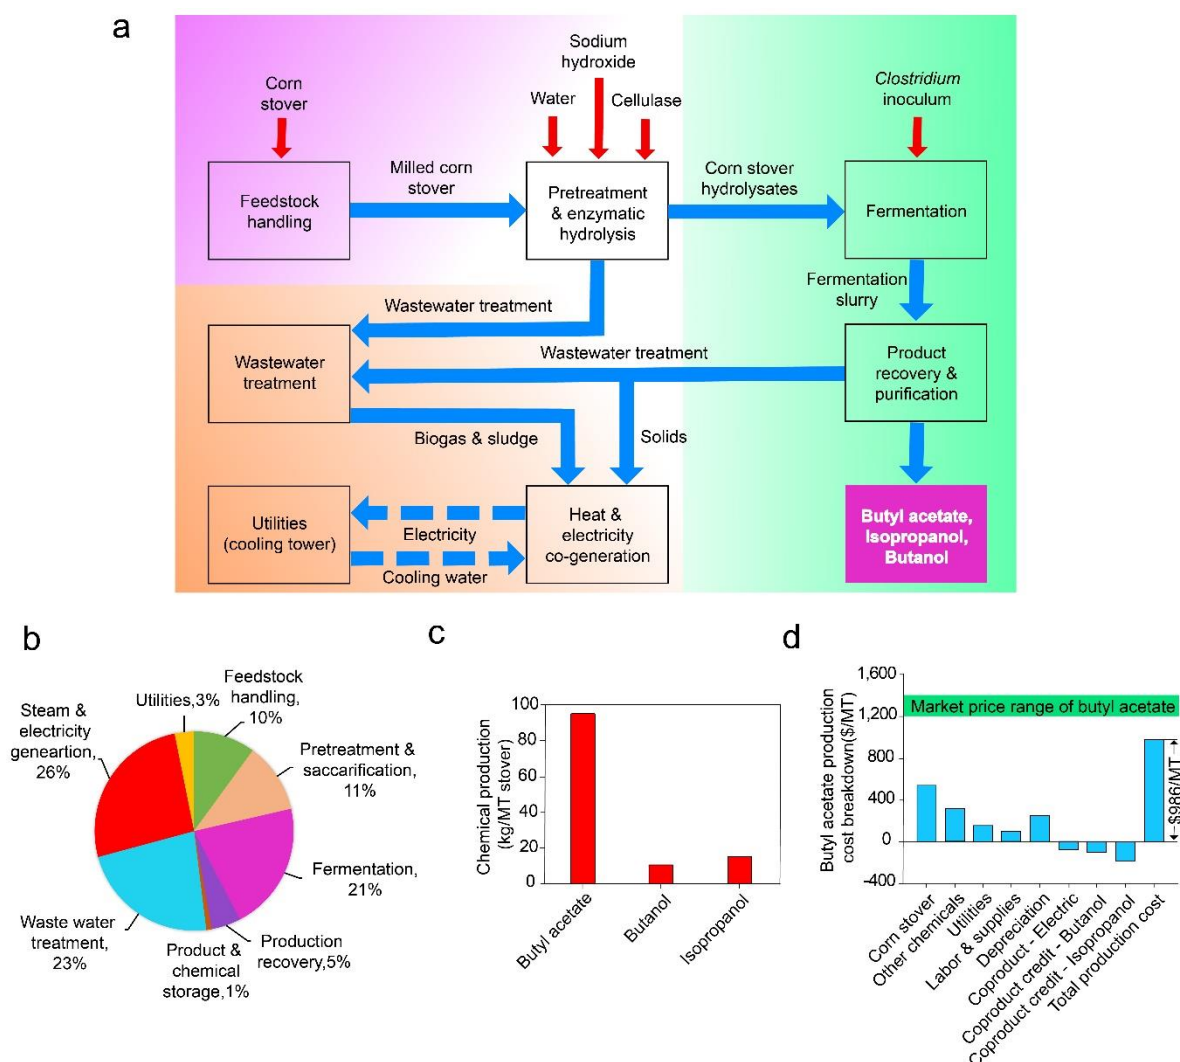

**Fig. 7. Techno-economic analysis of butyl acetate production from corn stover.** a) process overview; b) total installed equipment cost; c) chemical production from each metric tonne (MT) of corn stover; d) butyl acetate production cost.

391

## 392 **Discussion**

393 Although tremendous efforts have been invested on biofuel/biochemical research  
394 worldwide, very limited success has been achieved. A key bottleneck is that the microbial host  
395 is subject to endproduct toxicity and thus desirable production efficiency cannot be obtained<sup>42</sup>.  
396 Our central hypothesis was that metabolically engineering of microorganisms for high-value  
397 and easy-recoverable bioproduct production can help alleviate endproduct toxicity and thus  
398 high titer and productivity can be achieved, with which economically viable  
399 biofuel/biochemical production can be ultimately established. Here we tested this hypothesis  
400 by engineering solventogenic clostridia for high efficient ester (high-value and easy-  
401 recoverable) production. Our group have previously established versatile genome engineering  
402 tools for clostridia<sup>11,14,27</sup>, putting us at a strong position to perform this study.

403 Based on the systematic screening of host strains and enzymes as well as multiple rounds  
404 of rational metabolic engineering: enriching precursors (alcohols and acetyl-CoA) for ester  
405 production, dynamically expressing heterologous ester-production pathways, rationally  
406 organizing ester-synthesis enzymes, and improving strain robustness by eliminating putative  
407 prophages, we ultimately obtained strains for efficient production of esters in both synthetic  
408 fermentation medium and biomass hydrolysates. To the best of our knowledge, the production  
409 levels of BA and BB we achieved set up the new records. Overall, we demonstrated that  
410 clostridia are excellent platforms for valuable biofuel and biochemical production. The general  
411 principles that we demonstrated herein, including 1) selecting the most appropriate host for  
412 targeted bioproduction and 2) engineering the host for producing high value and easily  
413 recoverable products, are highly applicable to other relevant bioprocesses, and may result in  
414 breakthroughs in biofuel/biochemical production and general bioeconomy.

415

## 416 **Methods**

### 417 **Microorganisms and cultivation conditions**

418 All the strains and plasmids used in this study are listed in [Table S1](#). *C. pasteurianum*  
419 ATCC 6013 and *C. saccharoperbutylacetonicum* N1-4 (HMT) (DSM 14923) were requested  
420 from American Type Culture Collection (ATCC) and Deutsche Sammlung von  
421 Mikroorganismen und Zellkulturen (DSMZ), respectively. *C. beijerinckii* NCIMB 8052 was  
422 provided by Dr. Hans P. Blaschek<sup>14</sup>. *C. tyrobutyricum*  $\Delta cat1::adhE1$  and *C. tyrobutyricum*  
423  $\Delta cat1::adhE2$  are hyper-butanol producing mutants constructed in our lab<sup>11</sup>. All the clostridial  
424 strains were grown in an anaerobic chamber (N<sub>2</sub>-CO<sub>2</sub>-H<sub>2</sub> with a volume ratio of 85:10:5) at 35  
425 °C. Strains of *C. tyrobutyricum*, *C. saccharoperbutylacetonicum* and *C. beijerinckii* were  
426 cultivated using tryptone-glucose-yeast extract (TGY) medium<sup>43</sup>, while strains of *C.*  
427 *pasteurianum* were cultivated using 2×YTG medium<sup>44</sup>. When required, clarithromycin (Cla)  
428 or thiamphenicol (Tm) was supplemented into the medium at a final concentration of 30 µg/mL  
429 and 15 µg/mL, respectively. *E. coli* DH5α was used for routine plasmid propagation and  
430 maintenance. *E. coli* CA434 was used as the donor strain for plasmid conjugation for *C.*  
431 *tyrobutyricum*. Strains of *E. coli* were grown aerobically at 37 °C in Luria-Bertani (LB) medium  
432 supplemented with 100 µg/mL ampicillin (Amp), 50 µg/mL kanamycin (Kan) or 34 µg/mL  
433 chloramphenicol (Cm) as needed.

434

### 435 **Plasmid construction**

436 All the plasmids used in this study are listed in [Table S1](#), and all the primers used in this  
437 study are listed in [Table S2](#).

438 The plasmids pMTL82151 and pTJ1 were used as mother vectors for heterogeneous gene  
439 expression<sup>45,46</sup>. The promoter of the *cat1* gene (CTK\_C06520) ( $P_{cat}$ ) and the promoter of the



440 *thl* gene (CTK\_C01450) ( $P_{thl}$ ) from *C. tyrobutyricum* ATCC 25755 were amplified and inserted  
441 into pMTL82151 at the *EcoRI* site, and the generated plasmids were named as pMTL82151-  
442  $P_{cat}$  and pMTL82151- $P_{thl}$ , respectively. Promoters of the following gene, *pflA* (Cspa\_c13710)  
443 ( $P_{pfl}$ ), *ald* (Cspa\_c56880) ( $P_{ald}$ ), *adh* (Cspa\_c04380) ( $P_{adh}$ ) and *bdh* (Cspa\_c56790) ( $P_{bdh}$ ), all  
444 from *C. saccharoperbutylacetonicum* N1-4 (HMT) were amplified and inserted into  
445 pMTL82151 at the *EcoRI* site, and the generated plasmids were named as pMTL82151- $P_{pfl}$ ,  
446 pMTL82151- $P_{ald}$ , pMTL82151- $P_{adh}$  and pMTL82151- $P_{bdh}$ , respectively.

447 The *vaat* gene from *Fragaria vesca*, the *saat* gene from *F. ananassa* and the *atf1* gene from  
448 *S. cerevisiae* were amplified from plasmids pDL006, pDL001 and pDL004, respectively<sup>3,21</sup>.  
449 The *atf1*' (the codon optimized *atf1* gene), *ehl1* from *S. cerevisiae*<sup>19</sup>, and *lipaseB* from *Candida*  
450 *antarctica*<sup>47</sup> were all synthesized by GenScript (Piscataway, NJ, USA). The obtained gene  
451 fragments of *vaat*, *saat*, *atf1*, *atf1*', *ehl1*, and *lipaseB* were inserted between the *BtgZI* and  
452 *EcoRI* sites in pMTL82151- $P_{cat}$ , generating pMTL- $P_{cat}$ -*vaat*, pMTL- $P_{cat}$ -*saat*, pMTL- $P_{cat}$ -*atf1*,  
453 pMTL- $P_{cat}$ -*atf1*', pMTL- $P_{cat}$ -*ehl1*, and pMTL- $P_{cat}$ -*lipaseB*, respectively. The *atf1* gene was  
454 inserted between the *BtgZI* and *EcoRI* sites in pMTL82151- $P_{thl}$ , generating pMTL- $P_{thl}$ -*atf1*.

455 The  $P_{cat}$  promoter and the gene fragments of *vaat*, *saat*, *atf1*, *ehl1*, and *lipase* were amplified  
456 and ligated into the *EcoRI* site of pTJ1, generating pTJ1- $P_{cat}$ -*vaat*, pTJ1- $P_{cat}$ -*saat*, pTJ1- $P_{cat}$ -  
457 *atf1*, pTJ1- $P_{cat}$ -*ehl1* and pTJ1- $P_{cat}$ -*lipaseB*, respectively. The *atf1* gene was inserted into the  
458 *EcoRI* site of pMTL82151- $P_{pfl}$ , pMTL82151- $P_{ald}$ , pMTL82151- $P_{adh}$  and pMTL82151- $P_{bdh}$ ,  
459 generating pMTL- $P_{pfl}$ -*atf1*, pMTL- $P_{ald}$ -*atf1*, pMTL- $P_{adh}$ -*atf1* and pMTL- $P_{bdh}$ -*atf1*, respectively.

460 DNA sequences of *CC-Di-A*, *CC-Di-B*, *MinD* and *pduA*\* were synthesized by GenScript  
461 (Piscataway, NJ, USA). The MinD-tag was fused to the end of *atf1* with PCR and ligated into

462 the *EcoRI* site of pMTL-*P<sub>adh</sub>*, generating pMTL-*P<sub>adh</sub>-atfI-MinD*. In addition, the MinD-tag was  
463 fused to the end of *saat* with PCR and inserted between the *BtgZI* and *EcoRI* sites of pMTL-  
464 *P<sub>cat</sub>*, generating pMTL-*P<sub>cat</sub>-saat-MinD*.

465 The synthesized *CC-Di-A* fragment was ligated into the *EcoRI* site of pMTL-*P<sub>adh</sub>*,  
466 generating pMTL-*P<sub>adh</sub>-CC-Di-A*. The DNA fragments of *atfI* and *atfI-MinD* were amplified  
467 from pMTL-*P<sub>adh</sub>-atfI* and pMTL-*P<sub>adh</sub>-atfI-MinD* and then inserted into the *EcoRI* site of  
468 pMTL-*P<sub>adh</sub>-CC-Di-A*, obtaining pMTL-*P<sub>adh</sub>-A-atfI* and pMTL-*P<sub>adh</sub>-A-atfI-MinD*. The *CC-Di-*  
469 *B* sequence with the *nifJ* gene and *CC-Di-B* with the *bdhA* gene were subsequently inserted  
470 into the *KpnI* site of pMTL-*P<sub>adh</sub>-A-atfI*, generating pMTL-*P<sub>adh</sub>-A-atfI-B-nifJ* and pMTL-*P<sub>adh</sub>-*  
471 *A-atfI-B-nifJ-B-bdhA*. The DNA fragments of *CC-Di-B-pduA\**, *CC-Di-A-nifJ*, *CC-Di-A-bdhA*  
472 were inserted into the *EcoRI* site of pTJ1-*P<sub>cat</sub>*, generating pTJ1-*P<sub>cat</sub>-B-pduA\**, pTJ1-*P<sub>cat</sub>-B-*  
473 *pduA\*-A-nifJ* and pTJ1-*P<sub>cat</sub>-B-pduA\*-A-nifJ-A-bdhA*, respectively.

474 For the gene deletion or integration in *C. saccharoperbutylacetonicum*, all the relevant  
475 plasmids were constructed based on pYW34, which carries the customized CRISPR-Cas9  
476 system for genome editing in *C. saccharoperbutylacetonicum*<sup>14,27</sup>. The promoter P<sub>J23119</sub> and the  
477 gRNA (with 20-nt guide sequence targeting on the specific gene) were amplified by two rounds  
478 of PCR with primers N-20nt/YW1342 and YW1339/YW1342 as described previously (N  
479 represents the targeted gene)<sup>27</sup>. The obtained fragment was then inserted into pYW34 (digested  
480 with *BtgZI* and *NotI*) through Gibson Assembly, generating the intermediate vectors. For gene  
481 deletion, the fragment containing the two corresponding homology arms (~500-bp for each)  
482 for deleting the specific gene through homologous recombination was amplified and inserted

483 into the *NotI* site of the obtained intermediate vector as described above, generating pYW34-  
484  $\Delta N$  (N represents the targeted gene). For gene integration, the fragment containing the two  
485 corresponding homology arms (~1000-bp for each), the promoter and the gene fragment to be  
486 integrated, was amplified and inserted into the *NotI* site of the obtained intermediate vector as  
487 described above, generating the final plasmid for gene integration purpose.

488

### 489 **Fermentation with glucose as the substrate**

490 For the fermentation for ester production, the *C. pasteurianum* strain was cultivated in  
491 Biebl medium<sup>48</sup> with 50 g/L glycerol as the carbon source at 35 °C in the anaerobic chamber.  
492 When the OD<sub>600</sub> reached ~0.8, the seed culture was inoculated at a ratio of 10% into 100 mL  
493 of the same medium in a 250-mL serum bottle and then cultivated at an agitation of 150 rpm  
494 and 30 °C (on a shaker incubator) for 72 h. The *C. beijerinckii* strain was cultivated in TGY  
495 medium until the OD<sub>600</sub> reached ~0.8. Then the seed culture was inoculated at a ratio of 5%  
496 into 100 mL P2 medium along with 60 g/L glucose and 1 g/L yeast extract in a 250-mL serum  
497 bottle. The fermentation was carried out at an agitation of 150 rpm and 37 °C for 72 h<sup>43</sup>. The  
498 *C. tyrobutyricum* strain was cultivated in RCM medium at 35 °C until the OD<sub>600</sub> reached ~1.5.  
499 Then the seed culture was inoculated at a ratio of 5% into 200 mL fermentation medium  
500 (containing: 50 g/L glucose, 5 g/L yeast extract, 5 g/L tryptone, 3 g/L (NH<sub>4</sub>)<sub>2</sub>SO<sub>4</sub>, 1.5 g/L  
501 K<sub>2</sub>HPO<sub>4</sub>, 0.6 g/L MgSO<sub>4</sub>·7H<sub>2</sub>O, 0.03 g/L FeSO<sub>4</sub>·7H<sub>2</sub>O, and 1 g/L L-cysteine) in a 500-mL  
502 bioreactor (GS-MFC, Shanghai Gu Xin biological technology Co., Shanghai, China) and the  
503 fermentation was carried out at an agitation of 150 rpm and 37 °C for 120 h with pH controlled

504  $>6.0^9$ . The *C. saccharoperbutylacetonicum* strain was cultivated in TGY medium at 35 °C in  
505 the anaerobic chamber until the OD<sub>600</sub> reached ~0.8. Then the seed culture was inoculated at a  
506 ratio of 5% into 100 mL P2 medium along with 60 g/L glucose and 1 g/L yeast extract in a 250-  
507 mL serum bottle. The fermentation was carried out at an agitation of 150 rpm and 30 °C for  
508 120 h<sup>43</sup>. For the fermentation at larger scales in bioreactors, it was carried out in a 500-mL  
509 fermenter (GS-MFC, Shanghai Gu Xin biological technology Co., Shanghai, China) with a  
510 working volume of 250 mL with pH controlled  $>5.0$ , at 50 rpm and 30 °C for 120 h. Samples  
511 were taken every 24 h for analysis.

512 For all fermentations in the serum bottle, a needle and hosepipe were connected to the top  
513 of bottle for releasing the gases produced during the fermentation. For all the fermentations for  
514 ester production, the extractant *n*-hexadecane was added into the fermentation with a ratio of  
515 1:1 (volume of the extractant vs. volume of fermentation broth) for *in situ* ester extraction. The  
516 reported ester concentrations were the determined values in the extractant phase. All the  
517 fermentations were carried out in triplicate.

518

### 519 **Fermentation with biomass hydrolysates as the substrate**

520 The biomass hydrolysates was kindly provided by Dr. Daniel Schell from National  
521 Renewable Energy Laboratory (NREL) which was generated from corn stover through the  
522 innovative ‘deacetylation and mechanical refining in a disc refiner (DDR)’ approach<sup>49</sup>. For the  
523 fermentation, the biomass hydrolysate was diluted and supplemented into the P2 medium as  
524 the carbon source (with final sugar concentrations of 57.4 g/L glucose and 27.2 g/L xylose). In

525 addition, various concentrations of yeast extract (Y, g/L) and tryptone (T, g/L) were also added  
526 as the nitrogen source to evaluate their effects on the fermentation performance: 0Y+0T;  
527 1Y+3T and 2Y+6T. The fermentation was carried out under the same conditions as described  
528 above at 100 mL working volume in a 250-mL serum bottle. All the fermentations were carried  
529 out in triplicate.

530

### 531 **Analytical methods**

532 Concentrations of acetone, ethanol, butanol, acetic acid, butyric acid and glucose were  
533 measured using a high-performance liquid chromatography (HPLC, Agilent Technologies 1260  
534 Infinity series, Santa Clara, CA) with a refractive index Detector (RID), equipped with an  
535 Aminex HPX-87H column (Bio-Rad Laboratories, Hercules, CA). The column was eluted with  
536 5 mM H<sub>2</sub>SO<sub>4</sub> at a flow rate of 0.6 mL/min at 25 °C. The concentration of the ester in the *n*-  
537 hexadecane phase was quantified using a gas chromatography-mass spectrometry (GC-MS,  
538 Agilent Technologies 6890N, Santa Clara, CA) equipped with an HP-5 column (60m×0.25 mm,  
539 0.25 mm film thickness). Helium was used as the carrier gas. The initial temperature of the  
540 oven was set at 30 °C for 2 min, followed by a ramp of 10 °C/min to reach 300 °C, and a ramp  
541 of 2 °C/min to reach the final temperature of 320 °C, which was then held for 2 min. The  
542 detector was kept at 225 °C<sup>9</sup>.

543

544

545

546 **Authors' contributions**

547 J.F., Y.W. and I.B. designed the experiments. J.F., J.Z. (Jie Zhang), P.W., Y.G., Z.T.Z. and M.C.  
548 performed the experiments. Y.F. and H.H. performed the techno-economic analysis (TEA). J.F.,  
549 Y.F., H.H. and Y.W. drafted the manuscript. P.J.B., Y.G., and J.Z. (Junping Zhou) contributed  
550 to improve the figures. M.C. and Z.S. contributed to the manuscript revision. All authors read  
551 and approved the manuscript.

552

553 **Data availability**

554 The materials and data reported in this study are available upon reasonable request from the  
555 corresponding author.

556

557 **References**

- 558 1 Stephanopoulos, G. Challenges in engineering microbes for biofuels production.  
559 *Science* **315**, 801-804 (2007).
- 560 2 Liao, J. C., Mi, L., Pontrelli, S. & Luo, S. Fuelling the future: microbial engineering  
561 for the production of sustainable biofuels. *Nature Reviews Microbiology* **14**, 288  
562 (2016).
- 563 3 Layton, D. S. & Trinh, C. T. Expanding the modular ester fermentative pathways for  
564 combinatorial biosynthesis of esters from volatile organic acids. *Biotechnology and*  
565 *bioengineering* **113**, 1764-1776 (2016).
- 566 4 U.S. Esters Market Size, Share & Trends Analysis Report By Product (Fatty Esters,  
567 Phosphate Esters, Acrylic Esters, Cellulose Esters, Allyl and Aromatic Esters), By  
568 Application, And Segment Forecasts, 2019-2025.  
569 (<https://www.grandviewresearch.com/industry-analysis/us-esters-market>). *Grand view*  
570 *reserach* (2019).
- 571 5 Rodriguez, G. M., Tashiro, Y. & Atsumi, S. Expanding ester biosynthesis in  
572 *Escherichia coli*. *Nature chemical biology* **10**, 259-265 (2014).
- 573 6 Liu, Y., Lotero, E. & Goodwin, J. G. Effect of water on sulfuric acid catalyzed  
574 esterification. *Journal of Molecular Catalysis A: Chemical* **245**, 132-140 (2006).
- 575 7 van den Berg, C., Heeres, A. S., van der Wielen, L. A. & Straathof, A. J.  
576 Simultaneous clostridial fermentation, lipase-catalyzed esterification, and ester

- 577 extraction to enrich diesel with butyl butyrate. *Biotechnology and bioengineering* **110**,  
578 137-142 (2013).
- 579 8 Stergiou, P.-Y. *et al.* Advances in lipase-catalyzed esterification reactions.  
580 *Biotechnology advances* **31**, 1846-1859 (2013).
- 581 9 Zhang, Z. T., Taylor, S. & Wang, Y. In situ esterification and extractive fermentation  
582 for butyl butyrate production with *Clostridium tyrobutyricum*. *Biotechnology and*  
583 *Bioengineering* **114**, 1428-1437 (2017).
- 584 10 Verstrepen, K. J. *et al.* Expression levels of the yeast alcohol acetyltransferase genes  
585 ATF1, Lg-ATF1, and ATF2 control the formation of a broad range of volatile esters.  
586 *Applied and environmental microbiology* **69**, 5228-5237 (2003).
- 587 11 Zhang, J., Zong, W., Hong, W., Zhang, Z.-T. & Wang, Y. Exploiting endogenous  
588 CRISPR-Cas system for multiplex genome editing in *Clostridium tyrobutyricum* and  
589 engineer the strain for high-level butanol production. *Metabolic engineering* (2018).
- 590 12 Pyne, M. E., Bruder, M. R., Moo-Young, M., Chung, D. A. & Chou, C. P. Harnessing  
591 heterologous and endogenous CRISPR-Cas machineries for efficient markerless  
592 genome editing in *Clostridium*. *Sci Rep* **6**, 25666, doi:10.1038/srep25666 (2016).
- 593 13 Gu, Y. *et al.* Curing the endogenous megaplasmid in *Clostridium*  
594 *saccharoperbutylacetonicum* N1-4 (HMT) using CRISPR-Cas9 and preliminary  
595 investigation of the role of the plasmid for the strain metabolism. *Fuel* **236**, 1559-  
596 1566 (2019).
- 597 14 Wang, Y. *et al.* Bacterial genome editing with CRISPR-Cas9: deletion, Integration,  
598 single nucleotide modification, and desirable “clean” mutant selection in *Clostridium*  
599 *beijerinckii* as an example. *ACS synthetic biology* **5**, 721-732 (2016).
- 600 15 Yoo, M., Croux, C., Meynial-Salles, I. & Soucaille, P. Elucidation of the roles of  
601 *adhE1* and *adhE2* in the primary metabolism of *Clostridium acetobutylicum* by  
602 combining in-frame gene deletion and a quantitative system-scale approach.  
603 *Biotechnol Biofuels* **9**, 92, doi:10.1186/s13068-016-0507-0 (2016).
- 604 16 Han, S.-Y. *et al.* Highly efficient synthesis of ethyl hexanoate catalyzed by CALB-  
605 displaying *Saccharomyces cerevisiae* whole-cells in non-aqueous phase. *Journal of*  
606 *Molecular Catalysis B: Enzymatic* **59**, 168-172 (2009).
- 607 17 Aharoni, A. *et al.* Identification of the SAAT gene involved in strawberry flavor  
608 biogenesis by use of DNA microarrays. *The Plant Cell* **12**, 647-661 (2000).
- 609 18 Beekwilder, J. *et al.* Functional characterization of enzymes forming volatile esters  
610 from strawberry and banana. *Plant Physiology* **135**, 1865-1878 (2004).
- 611 19 Saerens, S. M. *et al.* The *Saccharomyces cerevisiae* EHT1 and EEB1 genes encode  
612 novel enzymes with medium-chain fatty acid ethyl ester synthesis and hydrolysis  
613 capacity. *Journal of Biological Chemistry* **281**, 4446-4456 (2006).
- 614 20 Tai, Y.-S., Xiong, M. & Zhang, K. Engineered biosynthesis of medium-chain esters in  
615 *Escherichia coli*. *Metabolic engineering* **27**, 20-28 (2015).
- 616 21 Layton, D. S. & Trinh, C. T. Engineering modular ester fermentative pathways in  
617 *Escherichia coli*. *Metabolic engineering* **26**, 77-88 (2014).

- 618 22 Noh, H. J., Woo, J. E., Lee, S. Y. & Jang, Y.-S. Metabolic engineering of *Clostridium*  
619 *acetobutylicum* for the production of butyl butyrate. *Applied microbiology and*  
620 *biotechnology*, 1-9 (2018).
- 621 23 Alonso-Gutierrez, J. *et al.* Metabolic engineering of *Escherichia coli* for limonene and  
622 perillyl alcohol production. *Metabolic engineering* **19**, 33-41 (2013).
- 623 24 Li, A. *et al.* Developing *Clostridium diolis* as a biorefinery chassis by genetic  
624 manipulation. *Bioresour Technol* **305**, 123066, doi:10.1016/j.biortech.2020.123066  
625 (2020).
- 626 25 Yagi, T., Yano, T., Di Bernardo, S. & Matsuno-Yagi, A. Prokaryotic complex I  
627 (NDH-1), an overview. *Biochimica et Biophysica Acta (BBA)-Bioenergetics* **1364**,  
628 125-133 (1998).
- 629 26 Liu, J. *et al.* Enhanced butanol production by increasing NADH and ATP levels in  
630 *Clostridium beijerinckii* NCIMB 8052 by insertional inactivation of *Cbei\_4110*.  
631 *Applied microbiology and biotechnology* **100**, 4985-4996 (2016).
- 632 27 Wang, S., Dong, S., Wang, P., Tao, Y. & Wang, Y. Genome Editing in *Clostridium*  
633 *saccharoperbutylacetonicum* N1-4 with the CRISPR-Cas9 System. *Applied and*  
634 *Environmental Microbiology* **83**, e00233-00217 (2017).
- 635 28 Hong, R. The cloning of a putative regulatory gene and the *sol* region from  
636 *Clostridium beijerinckii*, Virginia Tech, (1999).
- 637 29 Jang, Y. S. *et al.* Metabolic engineering of *Clostridium acetobutylicum* for the  
638 enhanced production of isopropanol-butanol-ethanol fuel mixture. *Biotechnology*  
639 *progress* **29**, 1083-1088 (2013).
- 640 30 Wang, P., Feng, J., Guo, L., Fasina, O. & Wang, Y. Engineering *Clostridium*  
641 *saccharoperbutylacetonicum* for high level Isopropanol-Butanol-Ethanol (IBE)  
642 production from acetic acid pretreated switchgrass using the CRISPR-Cas9 system.  
643 *ACS Sustainable Chemistry & Engineering* **7**, 18153-18164 (2019).
- 644 31 Kosaka, T., Nakayama, S., Nakaya, K., Yoshino, S. & Furukawa, K. Characterization  
645 of the *sol* operon in butanol-hyperproducing *Clostridium saccharoperbutylacetonicum*  
646 strain N1-4 and its degeneration mechanism. *Bioscience, biotechnology, and*  
647 *biochemistry* **71**, 58-68 (2007).
- 648 32 Lee, M. J. *et al.* Engineered synthetic scaffolds for organizing proteins within the  
649 bacterial cytoplasm. *Nature chemical biology* (2017).
- 650 33 Szeto, T. H., Rowland, S. L., Habrukowich, C. L. & King, G. F. The MinD membrane  
651 targeting sequence is a transplantable lipid-binding helix. *Journal of Biological*  
652 *Chemistry* **278**, 40050-40056 (2003).
- 653 34 Hongo, M., Murata, A. & Ogata, S. Bacteriophages of *Clostridium*  
654 *saccharoperbutylacetonicum*: Part XVI. Isolation and some characters of a temperate  
655 phage. *Agricultural and Biological Chemistry* **33**, 337-342 (1969).
- 656 35 Ogata, S., Mihara, O., Ikeda, Y. & Hongo, M. Inducible phage tail-like particles of  
657 *Clostridium saccharoperbutylacetonicum* and its related strains. *Agricultural and*  
658 *Biological Chemistry* **36**, 1413-1421 (1972).
- 659 36 Zhou, Y., Liang, Y., Lynch, K. H., Dennis, J. J. & Wishart, D. S. PFAST: a fast  
660 phage search tool. *Nucleic acids research* **39**, W347-W352 (2011).



- 661 37 Ogata, S., Nagao, N., Hidaka, Z. & Hongo, M. Bacteriophages of *Clostridium*  
662 *saccharoperbutylaceticum*: Part XVII. The structure of phage HM 2. *Agricultural*  
663 *and Biological Chemistry* **33**, 1541-1552 (1969).
- 664 38 D. Humbird, R. D., L. Tao, C. Kinchin., D. Hsu, A. A., P. Schoen, J. Lukas, B.  
665 Olthof, M. Worley, & D. Sexton, a. D. D. Process design and economics for  
666 biochemical conversion of lignocellulosic biomass to ethanol:dilute-acid pretreatment  
667 and enzymatic hydrolysis of corn stover. (No. NREL/TP-5100-47764). National  
668 Renewable Energy Lab.(NREL), Golden, CO (United States). (2011).
- 669 39 Tao, L. *et al.* Techno-economic analysis and life-cycle assessment of cellulosic  
670 isobutanol and comparison with cellulosic ethanol and n-butanol. *Biofuels,*  
671 *Bioproducts and Biorefining* **8**, 30-48 (2014).
- 672 40 Huang, H., Long, S. & Singh, V. Techno-economic analysis of biodiesel and ethanol  
673 co-production from lipid-producing sugarcane. *Biofuels, Bioproducts and Biorefining*  
674 **10**, 299-315 (2016).
- 675 41 [https://www.alibaba.com/product-detail/Purity-99-5-Butyl-Acetate-](https://www.alibaba.com/product-detail/Purity-99-5-Butyl-Acetate-Cas_62416155030.html?spm=a2700.galleryofferlist.0.0.67372e613qq3zW&s=p)  
676 [Cas\\_62416155030.html?spm=a2700.galleryofferlist.0.0.67372e613qq3zW&s=p](https://www.alibaba.com/product-detail/Purity-99-5-Butyl-Acetate-Cas_62416155030.html?spm=a2700.galleryofferlist.0.0.67372e613qq3zW&s=p)
- 677 42 Gong, Z., Nielsen, J. & Zhou, Y. J. Engineering robustness of microbial cell factories.  
678 *Biotechnology journal* **12**, 1700014 (2017).
- 679 43 Wang, Y. *et al.* Development of a gene knockout system using mobile group II  
680 introns (Targetron) and genetic disruption of acid production pathways in *Clostridium*  
681 *beijerinckii*. *Applied and environmental microbiology* **79**, 5853-5863 (2013).
- 682 44 Schwarz, K. M. *et al.* Towards improved butanol production through targeted genetic  
683 modification of *Clostridium pasteurianum*. *Metabolic engineering* **40**, 124-137  
684 (2017).
- 685 45 Heap, J. T., Pennington, O. J., Cartman, S. T. & Minton, N. P. A modular system for  
686 *Clostridium* shuttle plasmids. *Journal of microbiological methods* **78**, 79-85 (2009).
- 687 46 Wang, Y. *et al.* Development of a gene knockout system using mobile group II  
688 introns (Targetron) and genetic disruption of acid production pathways in *Clostridium*  
689 *beijerinckii*. *Applied and environmental microbiology*, **79**, 5853-5863 (2013).
- 690 47 Tamalampudi, S. *et al.* Development of recombinant *Aspergillus oryzae* whole-cell  
691 biocatalyst expressing lipase-encoding gene from *Candida antarctica*. *Applied*  
692 *microbiology and biotechnology* **75**, 387 (2007).
- 693 48 Biebl, H. Fermentation of glycerol by *Clostridium pasteurianum*-batch and  
694 continuous culture studies. *Journal of industrial microbiology & biotechnology* **27**,  
695 18-26 (2001).
- 696 49 Chen, X. *et al.* A highly efficient dilute alkali deacetylation and mechanical (disc)  
697 refining process for the conversion of renewable biomass to lower cost sugars.  
698 *Biotechnology for Biofuels* **7**, 98 (2014).

699

700

701 **Acknowledgments**

702 We thank Dr. Hans Blaschek (University of Illinois at Urbana-Champaign) for providing  
703 plasmids pYW34 and pTJ1, Dr. Nigel Minton (University of Nottingham) for providing pMTL  
704 series of plasmids, Dr. Cong T Trinh (University of Tennessee) for providing plasmids pDL001,  
705 pDL004 and pDL006, and Dr. Mike Young (Aberystwyth University, UK) for providing *E.*  
706 *coli* CA434. We thank Ms. Sheng Dong for constructing *C. pasteurianum* SD-1, and thank Drs.  
707 Michael Pyne and C. Perry Chou (University of Waterloo, Canada) for providing research  
708 materials and technical assistance for working on *C. pasteurianum*. We thank Dr. Daniel Schell  
709 (National Renewable Energy Laboratory) for providing the corn stover hydrolysates. We also  
710 thank Drs. Raymond P. Henry and Michael E. Miller (Auburn University) for allowing us to  
711 access their equipment for the phage preparation and TEM imaging.

712

713 **Author information**

714 **Affiliations**

715 *Department of Biosystems Engineering, Center for Bioenergy and Bioproducts, Auburn*  
716 *University, Auburn, Alabama 36849, United States*

717 Jun Feng, Jie Zhang, Pixiang Wang, Pablo Jiménez-Bonilla, Yanyan Gu, Junping Zhou, Zhong-  
718 Tian Zhang & Yi Wang

719 *Department of Food Science and Technology, Virginia Tech, Blacksburg, VA 24061, USA*

720 Yiming Feng & Haibo Huang

721 *Department of Chemical and Biological Engineering, NSF Engineering Research Center for*

722 *Biorenewable Chemicals, Iowa State University, Ames, IA, 50011, USA*

723 Mingfeng Cao & Zengyi Shao

724 *The School of Molecular Cell Biology and Biotechnology, Faculty of Life Sciences, Tel Aviv*

725 *University, Ramat Aviv, 6997801 Tel Aviv, Israel*

726 Ilya Borovok

727

728 **Corresponding author**

729 **Correspondence and requests for materials** should be addressed to H. H. or Y.W.

730

731 **Competing interests**

732 Auburn University has filed a patent application covering the work described in this article\*.

733 The application names Y.W. and J.F. as inventors.

734

735 **Funding**

736 This work was supported by the US Department of Energy's Office of Energy Efficiency and

737 Renewable Energy under Award DE-EE0008483 (Co-Optima), the Agriculture and Food

738 Research Initiative Competitive Grant no. 2018-67021-27715 from the USDA National

739 Institute of Food and Agriculture (NIFA), the Auburn University Intramural Grants Program

740 (IGP), the USDA-NIFA Hatch project (ALA014-1017025), and the Alabama Agricultural

741 Experiment Station.

---

\*The initial provisional patent was filed on December 19, 2017.

742 **Supplementary information**

743 *Supplementary Information*

744 Supplementary Information includes partial of the Methods, Results, Discussion and

745 Supplementary Figs. 1–10 and Tables 1–8.
